# Supplementary material for: Reduced Set of Virulence Genes Allows High Accuracy Prediction of Bacterial Pathogenicity in Humans
Source: PLoS One. 2012 Aug 6;7(8):e42144. doi: 10.1371/journal.pone.0042144 (PMC3412846; doi:10.1371/journal.pone.0042144)
Supplement: Table S2 — Classification results for each tested genome in 10-fold cross validation. (XLS) [file pone.0042144.s003.xls]

## Sheet: Hoja1
Assigned K-fold in cross-validation	Name	Taxon	Class 0:No 1:Human	Predicted class	Prob Class 0	Prob Class 1	Error
1	'Acidaminococcus fermentans DSM 20731'	'Firmicutes'	0	0	0.997062	0.00293808	0
1	'Acinetobacter baumannii AB0057'	'Gammaproteobacteria'	1	1	5.73033e-06	0.999994	0
1	'Acinetobacter baumannii SDF'	'Gammaproteobacteria'	1	1	0.00949313	0.990507	0
1	'Alcanivorax borkumensis SK2'	'Gammaproteobacteria'	0	0	0.971268	0.0287318	0
1	'Anoxybacillus flavithermus WK1'	'Firmicutes'	0	0	0.99929	0.000710153	0
1	'Bacillus cereus AH187'	'Firmicutes'	1	1	0.304675	0.695325	0
1	'Bacillus cereus ATCC 10987'	'Firmicutes'	1	1	0.0941272	0.905873	0
1	'Bacillus megaterium QM B1551'	'Firmicutes'	0	0	0.999724	0.000276364	0
1	'Bartonella bacilliformis KC583'	'Alphaproteobacteria'	1	1	0.0134037	0.986596	0
1	'Bartonella grahamii as4aup'	'Alphaproteobacteria'	1	1	0.00881901	0.991181	0
1	'Beutenbergia cavernae DSM 12333'	'Actinobacteria'	0	0	0.973102	0.0268979	0
1	'Bordetella petrii DSM 12804'	'Betaproteobacteria'	0	0	0.999932	6.76089e-05	0
1	'Brachyspira murdochii DSM 12563'	'Spirochaetes'	0	0	0.859557	0.140443	0
1	'Buchnera aphidicola str. Cc (Cinara cedri)'	'Gammaproteobacteria'	0	0	0.846889	0.153111	0
1	'Burkholderia mallei NCTC 10247'	'Betaproteobacteria'	1	1	0.0220566	0.977943	0
1	'Candidatus Desulforudis audaxviator MP104C'	'Firmicutes'	0	0	0.99999	9.98471e-06	0
1	'Clostridium kluyveri DSM 555'	'Firmicutes'	0	0	0.918453	0.0815471	0
1	'Clostridium saccharolyticum WM1'	'Firmicutes'	0	0	0.999994	6.46469e-06	0
1	'Clostridium tetani E88'	'Firmicutes'	1	1	0.00681972	0.99318	0
1	'Coprothermobacter proteolyticus DSM 5265'	'Firmicutes'	0	0	0.955988	0.044012	0
1	'Cytophaga hutchinsonii ATCC 33406'	'Bacteroidetes/Chlorobi'	0	0	0.945911	0.0540887	0
1	'Desulfotomaculum reducens MI-1'	'Firmicutes'	0	0	0.99999	1.0214e-05	0
1	'Escherichia coli O157:H7 str. TW14359'	'Gammaproteobacteria'	1	1	0.0136041	0.986396	0
1	'Flavobacterium johnsoniae UW101'	'Bacteroidetes/Chlorobi'	0	0	0.996291	0.00370942	0
1	'Francisella tularensis subsp. holarctica LVS'	'Gammaproteobacteria'	1	1	0.00509007	0.99491	0
1	'Frankia sp. EuI1c'	'Actinobacteria'	0	0	0.869742	0.130258	0
1	'Haemophilus influenzae Rd KW20'	'Gammaproteobacteria'	1	1	0.094312	0.905688	0
1	'Halothiobacillus neapolitanus c2'	'Gammaproteobacteria'	0	0	0.97027	0.0297295	0
1	'Helicobacter pylori J99'	'Epsilonproteobacteria'	1	1	0.0830052	0.916995	0
1	'Kangiella koreensis DSM 16069'	'Gammaproteobacteria'	0	0	0.999938	6.24048e-05	0
1	'Lactobacillus johnsonii NCC 533'	'Firmicutes'	0	0	0.977263	0.022737	0
1	'Lactococcus lactis subsp. lactis Il1403'	'Firmicutes'	0	0	0.911264	0.0887358	0
1	'Leptothrix cholodnii SP-6'	'Betaproteobacteria'	0	0	0.971128	0.0288721	0
1	'Mannheimia succiniciproducens MBEL55E'	'Gammaproteobacteria'	0	0	0.967945	0.0320547	0
1	'Methylobacterium extorquens AM1'	'Alphaproteobacteria'	0	0	0.993641	0.00635853	0
1	'Mycobacterium tuberculosis H37Rv'	'Actinobacteria'	1	1	0.106754	0.893246	0
1	'Neisseria gonorrhoeae NCCP11945'	'Betaproteobacteria'	1	1	0.0478885	0.952111	0
1	'Pelodictyon phaeoclathratiforme BU-1'	'Bacteroidetes/Chlorobi'	0	0	0.998885	0.00111476	0
1	'Polaromonas sp. JS666'	'Betaproteobacteria'	0	0	0.999989	1.0562e-05	0
1	'Pseudomonas aeruginosa UCBPP-PA14'	'Gammaproteobacteria'	1	1	1.33504e-05	0.999987	0
1	'Pseudomonas putida GB-1'	'Gammaproteobacteria'	0	0	0.923157	0.0768435	0
1	'Rhizobium etli CIAT 652'	'Alphaproteobacteria'	0	0	0.999992	7.95166e-06	0
1	'Rhodobacter capsulatus SB 1003'	'Alphaproteobacteria'	0	0	1	2.88211e-07	0
1	'Rhodobacter sphaeroides 2.4.1'	'Alphaproteobacteria'	0	0	0.999999	6.49784e-07	0
1	'Rhodococcus equi 103S'	'Actinobacteria'	1	1	0.0278934	0.972107	0
1	'Salinispora arenicola CNS-205'	'Actinobacteria'	0	0	0.98716	0.0128397	0
1	'Salmonella enterica subsp. enterica serovar Paratyphi C strain RKS4594'	'Gammaproteobacteria'	1	1	7.3867e-07	0.999999	0
1	'Salmonella enterica subsp. enterica serovar Typhi str. CT18'	'Gammaproteobacteria'	1	1	1.71037e-09	1	0
1	'Shewanella pealeana ATCC 700345'	'Gammaproteobacteria'	0	0	0.985013	0.0149875	0
1	'Shewanella woodyi ATCC 51908'	'Gammaproteobacteria'	0	0	0.999931	6.94555e-05	0
1	'Shigella flexneri 2a str. 2457T'	'Gammaproteobacteria'	1	1	0.00962323	0.990377	0
1	'Staphylococcus aureus RF122'	'Firmicutes'	1	1	1.00568e-10	1	0
1	'Staphylococcus aureus subsp. aureus USA300_FPR3757'	'Firmicutes'	1	1	1.48977e-10	1	0
1	'Streptococcus gordonii str. Challis substr. CH1'	'Firmicutes'	1	1	0.0226834	0.977317	0
1	'Streptococcus pneumoniae G54'	'Firmicutes'	1	1	2.78029e-06	0.999997	0
1	'Streptococcus pyogenes MGAS8232'	'Firmicutes'	1	1	0.0281391	0.971861	0
1	'Streptococcus pyogenes NZ131'	'Firmicutes'	1	1	0.0711088	0.928891	0
1	'Sulfurospirillum deleyianum DSM 6946'	'Epsilonproteobacteria'	0	0	0.808304	0.191696	0
1	'Thermoanaerobacter italicus Ab9'	'Firmicutes'	0	0	0.999996	3.78951e-06	0
1	'Ureaplasma parvum serovar 3 str. ATCC 27815'	'Firmicutes'	1	1	0.0941167	0.905883	0
1	'Variovorax paradoxus EPS'	'Betaproteobacteria'	0	0	1	2.35135e-07	0
1	'Yersinia enterocolitica subsp. enterocolitica 8081'	'Gammaproteobacteria'	1	0	0.524202	0.475798	1
1	'Yersinia pestis KIM 10'	'Gammaproteobacteria'	1	1	0.00515777	0.994842	0
1	'Yersinia pestis Pestoides F'	'Gammaproteobacteria'	1	1	0.00291255	0.997087	0
1	'Yersinia pseudotuberculosis IP 32953'	'Gammaproteobacteria'	1	1	7.98602e-07	0.999999	0
2	'Acinetobacter sp. ADP1'	'Gammaproteobacteria'	1	1	0.065754	0.934246	0
2	'Aggregatibacter actinomycetemcomitans D11S-1'	'Gammaproteobacteria'	1	1	9.92854e-06	0.99999	0
2	'Alicyclobacillus acidocaldarius subsp. acidocaldarius DSM 446'	'Firmicutes'	0	0	0.999956	4.4315e-05	0
2	'Aromatoleum aromaticum EbN1'	'Betaproteobacteria'	0	0	0.999834	0.000166203	0
2	'Bacillus amyloliquefaciens FZB42'	'Firmicutes'	0	0	0.915656	0.0843442	0
2	'Bifidobacterium adolescentis ATCC 15703'	'Actinobacteria'	0	0	0.989036	0.0109636	0
2	'Brachybacterium faecium DSM 4810'	'Actinobacteria'	0	0	0.979885	0.0201153	0
2	'Brucella suis ATCC 23445'	'Alphaproteobacteria'	1	1	0.0251523	0.974848	0
2	'Buchnera aphidicola str. 5A (Acyrthosiphon pisum)'	'Gammaproteobacteria'	0	0	0.997444	0.0025562	0
2	'Burkholderia phytofirmans PsJN'	'Betaproteobacteria'	0	1	0.0145829	0.985417	1
2	'Campylobacter fetus subsp. fetus 82-40'	'Epsilonproteobacteria'	1	1	0.0478089	0.952191	0
2	'Campylobacter jejuni subsp. jejuni NCTC 11168'	'Epsilonproteobacteria'	1	1	2.24495e-06	0.999998	0
2	'Caulobacter crescentus NA1000'	'Alphaproteobacteria'	0	0	0.964929	0.0350714	0
2	'Caulobacter sp. K31'	'Alphaproteobacteria'	0	0	0.985249	0.0147506	0
2	'Chlorobaculum parvum NCIB 8327'	'Bacteroidetes/Chlorobi'	0	0	0.99671	0.00329021	0
2	'Clostridium acetobutylicum ATCC 824'	'Firmicutes'	0	0	0.999524	0.000476182	0
2	'Clostridium botulinum A str. ATCC 19397'	'Firmicutes'	1	1	0.0943391	0.905661	0
2	'Clostridium botulinum B str. Eklund 17B'	'Firmicutes'	0	1	0.0315369	0.968463	1
2	'Clostridium difficile R20291'	'Firmicutes'	1	1	0.075924	0.924076	0
2	'Clostridium perfringens SM101'	'Firmicutes'	1	1	0.354349	0.645651	0
2	'Clostridium perfringens str. 13'	'Firmicutes'	1	1	0.00478067	0.995219	0
2	'Corynebacterium aurimucosum ATCC 700975'	'Actinobacteria'	1	1	0.00615532	0.993845	0
2	'Corynebacterium jeikeium K411'	'Actinobacteria'	1	1	0.20935	0.79065	0
2	'Edwardsiella tarda EIB202'	'Gammaproteobacteria'	1	1	2.16932e-08	1	0
2	'Escherichia coli SMS-3-5'	'Gammaproteobacteria'	0	1	0.079924	0.920076	1
2	'Gardnerella vaginalis ATCC 14019'	'Actinobacteria'	1	1	0.0204981	0.979502	0
2	'Geobacillus sp. Y4.1MC1'	'Firmicutes'	0	0	1	1e-07	0
2	'Geodermatophilus obscurus DSM 43160'	'Actinobacteria'	0	0	0.97826	0.0217405	0
2	'Haemophilus influenzae 86-028NP'	'Gammaproteobacteria'	1	1	0.0850434	0.914957	0
2	'Haemophilus somnus 2336'	'Gammaproteobacteria'	1	1	0.0356615	0.964338	0
2	'Klebsiella pneumoniae subsp. pneumoniae MGH 78578'	'Gammaproteobacteria'	1	1	0.193492	0.806508	0
2	'Lactobacillus rhamnosus GG'	'Firmicutes'	0	0	0.999723	0.000276506	0
2	'Listeria monocytogenes'	'Firmicutes'	1	1	0.0408445	0.959155	0
2	'Maribacter sp. HTCC2170'	'Bacteroidetes/Chlorobi'	0	0	0.684102	0.315898	0
2	'Methylotenera mobilis JLW8'	'Betaproteobacteria'	0	0	0.99615	0.00385007	0
2	'Methylovorus sp. SIP3-4'	'Betaproteobacteria'	0	0	0.999465	0.000535237	0
2	'Mycobacterium leprae TN'	'Actinobacteria'	1	1	0.082707	0.917293	0
2	'Mycobacterium smegmatis str. MC2 155'	'Actinobacteria'	1	1	0.0290454	0.970955	0
2	'Mycobacterium sp. JLS'	'Actinobacteria'	0	0	0.902325	0.0976748	0
2	'Mycobacterium tuberculosis F11'	'Actinobacteria'	1	1	0.0827893	0.917211	0
2	'Neisseria gonorrhoeae FA 1090'	'Betaproteobacteria'	1	1	0.025962	0.974038	0
2	'Pedobacter heparinus DSM 2366'	'Bacteroidetes/Chlorobi'	0	0	0.989245	0.0107545	0
2	'Porphyromonas gingivalis ATCC 33277'	'Bacteroidetes/Chlorobi'	1	0	0.63962	0.36038	1
2	'Pseudomonas putida KT2440'	'Gammaproteobacteria'	0	0	0.997942	0.00205777	0
2	'Psychromonas ingrahamii 37'	'Gammaproteobacteria'	0	0	1	1e-07	0
2	'Rhizobium leguminosarum bv. trifolii WSM2304'	'Alphaproteobacteria'	0	0	0.999991	8.53375e-06	0
2	'Rickettsia africae ESF-5'	'Alphaproteobacteria'	1	1	0.013179	0.986821	0
2	'Saccharomonospora viridis DSM 43017'	'Actinobacteria'	1	0	0.704689	0.295311	1
2	'Salmonella enterica subsp. enterica serovar Newport str. SL254'	'Gammaproteobacteria'	1	1	9.98765e-07	0.999999	0
2	'Shewanella violacea DSS12'	'Gammaproteobacteria'	0	0	0.999944	5.60603e-05	0
2	'Sinorhizobium meliloti 1021'	'Alphaproteobacteria'	0	0	0.998074	0.00192577	0
2	'Staphylococcus aureus subsp. aureus JH9'	'Firmicutes'	1	1	3.18179e-11	1	0
2	'Staphylococcus aureus subsp. aureus MSSA476'	'Firmicutes'	1	1	2.0227e-10	1	0
2	'Staphylococcus aureus subsp. aureus Mu50'	'Firmicutes'	1	1	6.94508e-11	1	0
2	'Staphylococcus aureus subsp. aureus NCTC 8325'	'Firmicutes'	1	1	3.18179e-11	1	0
2	'Staphylococcus saprophyticus subsp. saprophyticus ATCC 15305'	'Firmicutes'	1	1	0.221899	0.778101	0
2	'Streptococcus agalactiae NEM316'	'Firmicutes'	1	1	0.0484788	0.951521	0
2	'Streptococcus equi subsp. zooepidemicus'	'Firmicutes'	1	1	0.0852014	0.914799	0
2	'Streptococcus mutans NN2025'	'Firmicutes'	1	1	0.359951	0.640049	0
2	'Streptococcus pneumoniae D39'	'Firmicutes'	1	1	6.68364e-06	0.999993	0
2	'Streptococcus pneumoniae Taiwan19F-14'	'Firmicutes'	1	1	6.68364e-06	0.999993	0
2	'Streptococcus pyogenes MGAS10270'	'Firmicutes'	1	1	0.0252179	0.974782	0
2	'Streptococcus pyogenes MGAS9429'	'Firmicutes'	1	1	0.0332784	0.966722	0
2	'Thioalkalivibrio sp. HL-EbGR7'	'Gammaproteobacteria'	0	0	0.979511	0.0204891	0
2	'Thiobacillus denitrificans ATCC 25259'	'Betaproteobacteria'	0	0	0.717053	0.282947	0
2	'Vibrio cholerae M66-2'	'Gammaproteobacteria'	1	1	0.0114324	0.988568	0
3	'Acidiphilium cryptum JF-5'	'Alphaproteobacteria'	0	0	0.989711	0.0102891	0
3	'Acidithiobacillus ferrooxidans ATCC 23270'	'Gammaproteobacteria'	0	0	0.995897	0.00410336	0
3	'Acidovorax sp. JS42'	'Betaproteobacteria'	0	0	0.999999	6.31155e-07	0
3	'Acinetobacter baumannii ACICU'	'Gammaproteobacteria'	1	1	2.45559e-06	0.999998	0
3	'Arthrobacter sp. FB24'	'Actinobacteria'	0	0	0.968239	0.0317613	0
3	'Bartonella quintana str. Toulouse'	'Alphaproteobacteria'	1	1	0.00824353	0.991756	0
3	'Borrelia duttonii Ly'	'Spirochaetes'	1	1	1.9161e-05	0.999981	0
3	'Borrelia garinii PBi'	'Spirochaetes'	1	1	8.3076e-06	0.999992	0
3	'Bradyrhizobium japonicum USDA 110'	'Alphaproteobacteria'	0	0	0.999802	0.000198369	0
3	'Burkholderia cenocepacia AU 1054'	'Betaproteobacteria'	1	1	0.00631655	0.993683	0
3	'Burkholderia sp. 383'	'Betaproteobacteria'	1	1	0.00275118	0.997249	0
3	'Butyrivibrio proteoclasticus B316'	'Firmicutes'	0	0	0.984699	0.0153007	0
3	'Campylobacter concisus 13826'	'Epsilonproteobacteria'	1	1	0.0284799	0.97152	0
3	'Campylobacter jejuni RM1221'	'Epsilonproteobacteria'	1	1	9.22803e-06	0.999991	0
3	'Campylobacter jejuni subsp. doylei 269.97'	'Epsilonproteobacteria'	1	1	0.00556527	0.994435	0
3	'Campylobacter jejuni subsp. jejuni 81116'	'Epsilonproteobacteria'	1	1	5.31355e-06	0.999995	0
3	'Caulobacter crescentus CB15'	'Alphaproteobacteria'	0	0	0.97403	0.0259701	0
3	'Chlorobium limicola DSM 245'	'Bacteroidetes/Chlorobi'	0	0	0.999095	0.000904731	0
3	'Citrobacter koseri ATCC BAA-895'	'Gammaproteobacteria'	1	1	0.0961298	0.90387	0
3	'Clostridium ljungdahlii DSM 13528'	'Firmicutes'	0	0	0.955651	0.044349	0
3	'Coxiella burnetii Dugway 5J108-111'	'Gammaproteobacteria'	1	1	0.0716172	0.928383	0
3	'Dechloromonas aromatica RCB'	'Betaproteobacteria'	0	0	0.999445	0.000554704	0
3	'Eggerthella lenta DSM 2243'	'Actinobacteria'	1	1	0.203082	0.796918	0
3	'Ehrlichia chaffeensis str. Arkansas'	'Alphaproteobacteria'	1	1	0.082711	0.917289	0
3	'Erwinia tasmaniensis Et1/99'	'Gammaproteobacteria'	0	1	0.123422	0.876578	1
3	'Escherichia coli O157:H7 str. EDL933'	'Gammaproteobacteria'	1	1	0.00429504	0.995705	0
3	'Escherichia coli O26:H11 str. 11368'	'Gammaproteobacteria'	1	1	2.13361e-08	1	0
3	'Gluconacetobacter diazotrophicus PAl 5'	'Alphaproteobacteria'	0	0	0.923893	0.0761073	0
3	'Haemophilus influenzae PittEE'	'Gammaproteobacteria'	1	1	0.0758879	0.924112	0
3	'Hirschia baltica ATCC 49814'	'Alphaproteobacteria'	0	0	0.997384	0.0026159	0
3	'Jannaschia sp. CCS1'	'Alphaproteobacteria'	0	0	1	2.72048e-07	0
3	'Klebsiella pneumoniae 342'	'Gammaproteobacteria'	0	0	0.716192	0.283808	0
3	'Lactobacillus brevis ATCC 367'	'Firmicutes'	0	0	0.778847	0.221153	0
3	'Leuconostoc citreum KM20'	'Firmicutes'	0	0	0.999738	0.000262081	0
3	'Listeria innocua Clip11262'	'Firmicutes'	0	0	0.925984	0.0740163	0
3	'Mycobacterium abscessus ATCC 19977'	'Actinobacteria'	1	1	8.4674e-09	1	0
3	'Mycobacterium bovis BCG str. Tokyo 172'	'Actinobacteria'	1	1	0.0827893	0.917211	0
3	'Novosphingobium aromaticivorans DSM 12444'	'Alphaproteobacteria'	0	0	0.998681	0.00131938	0
3	'Pelotomaculum thermopropionicum SI'	'Firmicutes'	0	0	0.999986	1.44052e-05	0
3	'Polaromonas naphthalenivorans CJ2'	'Betaproteobacteria'	0	0	0.97779	0.0222098	0
3	'Pseudomonas aeruginosa PAO1'	'Gammaproteobacteria'	1	1	0.0039435	0.996056	0
3	'Rhizobium leguminosarum bv. trifolii WSM1325'	'Alphaproteobacteria'	0	0	0.999767	0.00023281	0
3	'Rickettsia akari str. Hartford'	'Alphaproteobacteria'	1	1	0.0193787	0.980621	0
3	'Rubrobacter xylanophilus DSM 9941'	'Actinobacteria'	0	0	0.998956	0.00104447	0
3	'Ruegeria sp. TM1040'	'Alphaproteobacteria'	0	0	0.99935	0.000649958	0
3	'Salmonella enterica subsp. enterica serovar Choleraesuis str. SC-B67'	'Gammaproteobacteria'	1	1	0.00355518	0.996445	0
3	'Salmonella enterica subsp. enterica serovar Enteritidis str. P125109'	'Gammaproteobacteria'	1	1	1.38151e-07	1	0
3	'Shewanella piezotolerans WP3'	'Gammaproteobacteria'	0	0	0.999995	5.1339e-06	0
3	'Shewanella sediminis HAW-EB3'	'Gammaproteobacteria'	0	0	0.999998	2.25505e-06	0
3	'Shigella dysenteriae Sd197'	'Gammaproteobacteria'	1	1	1.71187e-07	1	0
3	'Shigella flexneri 5 str. 8401'	'Gammaproteobacteria'	1	1	0.0044169	0.995583	0
3	'Shigella sonnei Ss046'	'Gammaproteobacteria'	1	1	0.00262929	0.997371	0
3	'Sphingobium japonicum UT26S'	'Alphaproteobacteria'	0	0	0.99254	0.00746001	0
3	'Streptococcus pneumoniae Hungary19A-6'	'Firmicutes'	1	1	6.24239e-07	0.999999	0
3	'Streptococcus suis 98HAH33'	'Firmicutes'	1	1	0.031663	0.968337	0
3	'Streptococcus thermophilus LMG 18311'	'Firmicutes'	0	0	0.919981	0.0800191	0
3	'Streptomyces avermitilis MA-4680'	'Actinobacteria'	0	0	0.977376	0.0226244	0
3	'Syntrophothermus lipocalidus DSM 12680'	'Firmicutes'	0	0	0.999968	3.24213e-05	0
3	'Thermincola potens JR'	'Firmicutes'	0	0	0.99999	9.70658e-06	0
3	'Thermoanaerobacter brockii subsp. finnii Ako-1'	'Firmicutes'	0	0	0.979756	0.0202435	0
3	'Thermoanaerobacter tengcongensis MB4'	'Firmicutes'	0	0	0.991877	0.00812343	0
3	'Thermoanaerobacterium thermosaccharolyticum DSM 571'	'Firmicutes'	0	0	0.999703	0.000296795	0
3	'Tolumonas auensis DSM 9187'	'Gammaproteobacteria'	0	0	0.99982	0.000179996	0
3	'Vibrio cholerae O1 biovar El Tor str. N16961'	'Gammaproteobacteria'	1	1	0.333744	0.666256	0
3	'Vibrio vulnificus YJ016'	'Gammaproteobacteria'	1	1	0.0591684	0.940832	0
4	'Bacillus cytotoxicus NVH 391-98'	'Firmicutes'	1	1	0.0125459	0.987454	0
4	'Bacillus licheniformis ATCC 14580'	'Firmicutes'	1	1	0.488054	0.511946	0
4	'Bacillus subtilis subsp. spizizenii str. W23'	'Firmicutes'	0	0	0.9811	0.0188996	0
4	'Bacillus weihenstephanensis KBAB4'	'Firmicutes'	1	1	0.0153836	0.984616	0
4	'Bifidobacterium dentium Bd1'	'Actinobacteria'	1	0	0.660937	0.339063	1
4	'Bifidobacterium longum NCC2705'	'Actinobacteria'	0	0	0.926732	0.0732677	0
4	'Borrelia recurrentis A1'	'Spirochaetes'	1	1	0.00371531	0.996285	0
4	'Buchnera aphidicola str. Sg (Schizaphis graminum)'	'Gammaproteobacteria'	0	0	0.978089	0.021911	0
4	'Burkholderia cenocepacia HI2424'	'Betaproteobacteria'	1	1	0.0392531	0.960747	0
4	'Burkholderia cenocepacia MC0-3'	'Betaproteobacteria'	1	1	0.0248573	0.975143	0
4	'Caldicellulosiruptor bescii DSM 6725'	'Firmicutes'	0	0	0.998526	0.00147389	0
4	'Caldicellulosiruptor owensensis OL'	'Firmicutes'	0	0	0.999977	2.33436e-05	0
4	'Candidatus Blochmannia floridanus'	'Gammaproteobacteria'	0	0	0.825349	0.174651	0
4	'Capnocytophaga ochracea DSM 7271'	'Bacteroidetes/Chlorobi'	1	1	0.0319008	0.968099	0
4	'Cellulomonas flavigena DSM 20109'	'Actinobacteria'	0	0	0.998948	0.00105204	0
4	'Clostridium botulinum Ba4 str. 657'	'Firmicutes'	1	1	0.0459964	0.954004	0
4	'Clostridium cellulolyticum H10'	'Firmicutes'	0	0	0.999948	5.21724e-05	0
4	'Clostridium difficile 630'	'Firmicutes'	1	1	0.0837848	0.916215	0
4	'Clostridium perfringens ATCC 13124'	'Firmicutes'	1	1	0.00905972	0.99094	0
4	'Cronobacter sakazakii ATCC BAA-894'	'Gammaproteobacteria'	1	1	0.00356975	0.99643	0
4	'Cryptobacterium curtum DSM 15641'	'Actinobacteria'	1	1	0.0356739	0.964326	0
4	'Desulfotomaculum acetoxidans DSM 771'	'Firmicutes'	0	0	0.999998	1.58031e-06	0
4	'Escherichia coli O111:H- str. 11128'	'Gammaproteobacteria'	1	1	3.15468e-07	1	0
4	'Escherichia coli O127:H6 str. E2348/69'	'Gammaproteobacteria'	1	1	0.0328814	0.967119	0
4	'Francisella philomiragia subsp. philomiragia ATCC 25017'	'Gammaproteobacteria'	1	1	1.88868e-08	1	0
4	'Haemophilus ducreyi 35000HP'	'Gammaproteobacteria'	1	1	0.416624	0.583376	0
4	'Hahella chejuensis KCTC 2396'	'Gammaproteobacteria'	0	0	0.791951	0.208049	0
4	'Klebsiella pneumoniae subsp. pneumoniae NTUH-K2044'	'Gammaproteobacteria'	1	1	3.61795e-08	1	0
4	'Kribbella flavida DSM 17836'	'Actinobacteria'	0	0	0.906922	0.0930776	0
4	'Lactobacillus amylovorus GRL 1112'	'Firmicutes'	0	0	0.954025	0.0459749	0
4	'Lactobacillus casei BL23'	'Firmicutes'	0	0	0.999923	7.74455e-05	0
4	'Lactobacillus delbrueckii subsp. bulgaricus ATCC BAA-365'	'Firmicutes'	0	0	0.997574	0.00242631	0
4	'Lactobacillus plantarum WCFS1'	'Firmicutes'	0	0	0.999745	0.000255144	0
4	'Laribacter hongkongensis HLHK9'	'Betaproteobacteria'	1	1	0.0297194	0.970281	0
4	'Methylobacterium sp. 4-46'	'Alphaproteobacteria'	0	0	0.999327	0.000673229	0
4	'Mycoplasma genitalium G37'	'Firmicutes'	1	1	0.0758388	0.924161	0
4	'Mycoplasma pneumoniae M129'	'Firmicutes'	1	1	0.0604444	0.939556	0
4	'Nitrosomonas europaea ATCC 19718'	'Betaproteobacteria'	0	0	0.977899	0.0221011	0
4	'Orientia tsutsugamushi str. Boryong'	'Alphaproteobacteria'	1	1	0.018859	0.981141	0
4	'Paenibacillus polymyxa E681'	'Firmicutes'	0	0	0.999485	0.00051522	0
4	'Prevotella ruminicola 23'	'Bacteroidetes/Chlorobi'	0	0	0.940306	0.0596943	0
4	'Pseudomonas fluorescens Pf-5'	'Gammaproteobacteria'	0	1	0.140262	0.859738	1
4	'Pseudomonas putida F1'	'Gammaproteobacteria'	0	0	0.907756	0.0922444	0
4	'Rhizobium etli CFN 42'	'Alphaproteobacteria'	0	0	0.999993	6.76225e-06	0
4	'Rhodopseudomonas palustris BisB5'	'Alphaproteobacteria'	0	0	0.998767	0.00123275	0
4	'Rothia mucilaginosa'	'Actinobacteria'	1	1	0.421292	0.578708	0
4	'Ruegeria pomeroyi DSS-3'	'Alphaproteobacteria'	0	0	0.985822	0.0141784	0
4	'Salinibacter ruber DSM 13855'	'Bacteroidetes/Chlorobi'	0	0	0.996993	0.0030066	0
4	'Salmonella enterica subsp. enterica serovar Agona str. SL483'	'Gammaproteobacteria'	1	1	2.6068e-07	1	0
4	'Salmonella enterica subsp. enterica serovar Dublin str. CT_02021853'	'Gammaproteobacteria'	1	1	1.42724e-07	1	0
4	'Shigella boydii CDC 3083-94'	'Gammaproteobacteria'	1	1	5.82472e-09	1	0
4	'Streptococcus agalactiae A909'	'Firmicutes'	1	1	0.0131077	0.986892	0
4	'Streptococcus dysgalactiae subsp. equisimilis GGS_124'	'Firmicutes'	1	1	0.00620388	0.993796	0
4	'Streptococcus pneumoniae 670-6B'	'Firmicutes'	1	1	6.5902e-06	0.999993	0
4	'Streptococcus pneumoniae P1031'	'Firmicutes'	1	1	6.5902e-06	0.999993	0
4	'Streptococcus pyogenes MGAS10394'	'Firmicutes'	1	1	0.0252179	0.974782	0
4	'Teredinibacter turnerae T7901'	'Gammaproteobacteria'	0	0	0.999999	8.44043e-07	0
4	'Thermobifida fusca YX'	'Actinobacteria'	1	0	0.805403	0.194597	1
4	'Treponema pallidum subsp. pallidum str. Nichols'	'Spirochaetes'	1	1	0.106687	0.893313	0
4	'Tropheryma whipplei str. Twist'	'Actinobacteria'	1	1	0.183047	0.816953	0
4	'Vibrio cholerae MJ-1236'	'Gammaproteobacteria'	1	1	1.48692e-05	0.999985	0
4	'Vibrio fischeri ES114'	'Gammaproteobacteria'	0	0	0.989197	0.0108026	0
4	'Wolbachia endosymbiont of Drosophila melanogaster'	'Alphaproteobacteria'	0	0	0.742884	0.257116	0
4	'Yersinia pestis biovar Microtus str. 91001'	'Gammaproteobacteria'	1	1	3.34943e-09	1	0
4	'Yersinia pseudotuberculosis YPIII'	'Gammaproteobacteria'	1	1	0.00515777	0.994842	0
5	'Alkaliphilus metalliredigens QYMF'	'Firmicutes'	0	0	0.990835	0.00916492	0
5	'Alkaliphilus oremlandii OhILAs'	'Firmicutes'	0	0	0.997909	0.00209129	0
5	'Allochromatium vinosum DSM 180'	'Gammaproteobacteria'	0	0	0.998484	0.00151614	0
5	'Ammonifex degensii KC4'	'Firmicutes'	0	0	1	1.09972e-07	0
5	'Arthrobacter chlorophenolicus A6'	'Actinobacteria'	0	0	0.99971	0.00029037	0
5	'Bacillus subtilis subsp. subtilis str. 168'	'Firmicutes'	0	0	0.90222	0.0977796	0
5	'Bifidobacterium longum subsp. longum JDM301'	'Actinobacteria'	0	0	0.985442	0.0145575	0
5	'Borrelia burgdorferi ZS7'	'Spirochaetes'	1	1	0.0329764	0.967024	0
5	'Borrelia turicatae 91E135'	'Spirochaetes'	1	1	0.00321313	0.996787	0
5	'Bradyrhizobium sp. ORS278'	'Alphaproteobacteria'	0	0	0.999861	0.000138753	0
5	'Brucella abortus bv. 1 str. 9-941'	'Alphaproteobacteria'	1	1	6.53173e-06	0.999993	0
5	'Brucella canis ATCC 23365'	'Alphaproteobacteria'	1	1	0.0586366	0.941363	0
5	'Burkholderia cenocepacia J2315'	'Betaproteobacteria'	1	1	0.0403989	0.959601	0
5	'Burkholderia mallei ATCC 23344'	'Betaproteobacteria'	1	1	2.22687e-06	0.999998	0
5	'Caldicellulosiruptor kristjanssonii 177R1B'	'Firmicutes'	0	0	0.999677	0.00032298	0
5	'Carboxydothermus hydrogenoformans Z-2901'	'Firmicutes'	0	0	0.911168	0.0888317	0
5	'Chelativorans sp. BNC1'	'Alphaproteobacteria'	0	0	0.924229	0.075771	0
5	'Chlorobium phaeobacteroides DSM 266'	'Bacteroidetes/Chlorobi'	0	0	0.999696	0.000304016	0
5	'Chlorobium tepidum TLS'	'Bacteroidetes/Chlorobi'	0	0	0.993933	0.00606654	0
5	'Clostridium botulinum A str. Hall'	'Firmicutes'	1	1	0.0730293	0.926971	0
5	'Clostridium phytofermentans ISDg'	'Firmicutes'	0	0	0.999074	0.000926434	0
5	'Clostridium thermocellum ATCC 27405'	'Firmicutes'	0	0	0.999878	0.000121959	0
5	'Colwellia psychrerythraea 34H'	'Gammaproteobacteria'	0	0	0.992092	0.00790754	0
5	'Coxiella burnetii RSA 331'	'Gammaproteobacteria'	1	1	0.0852897	0.91471	0
5	'Escherichia coli 536'	'Gammaproteobacteria'	1	1	0.0667844	0.933216	0
5	'Escherichia coli CFT073'	'Gammaproteobacteria'	1	1	0.0663664	0.933634	0
5	'Escherichia coli IAI39'	'Gammaproteobacteria'	1	1	0.343252	0.656748	0
5	'Escherichia coli O103:H2 str. 12009'	'Gammaproteobacteria'	1	1	0.0054785	0.994522	0
5	'Gluconacetobacter diazotrophicus PAl 5'	'Alphaproteobacteria'	0	0	0.909159	0.0908409	0
5	'Halothermothrix orenii H 168'	'Firmicutes'	0	0	0.995962	0.00403773	0
5	'Kineococcus radiotolerans SRS30216'	'Actinobacteria'	0	0	0.987454	0.0125462	0
5	'Lactobacillus reuteri JCM 1112'	'Firmicutes'	0	0	0.94428	0.0557199	0
5	'Lactococcus lactis subsp. cremoris SK11'	'Firmicutes'	0	0	0.829124	0.170876	0
5	'Leuconostoc kimchii IMSNU 11154'	'Firmicutes'	0	0	0.999991	9.08008e-06	0
5	'Listeria monocytogenes serotype 4b str. F2365'	'Firmicutes'	1	1	0.124517	0.875483	0
5	'Listeria welshimeri serovar 6b str. SLCC5334'	'Firmicutes'	0	0	0.964478	0.0355222	0
5	'Marinobacter aquaeolei VT8'	'Gammaproteobacteria'	0	0	0.694228	0.305772	0
5	'Marinomonas sp. MWYL1'	'Gammaproteobacteria'	0	0	1	1e-07	0
5	'Methylobacterium radiotolerans JCM 2831'	'Alphaproteobacteria'	0	0	0.912559	0.0874411	0
5	'Moraxella catarrhalis RH4'	'Gammaproteobacteria'	1	1	0.155675	0.844325	0
5	'Mycobacterium marinum M'	'Actinobacteria'	1	1	0.188697	0.811303	0
5	'Neisseria meningitidis FAM18'	'Betaproteobacteria'	1	1	0.0252075	0.974793	0
5	'Neisseria meningitidis MC58'	'Betaproteobacteria'	1	1	0.00807264	0.991927	0
5	'Neorickettsia sennetsu str. Miyayama'	'Alphaproteobacteria'	1	0	0.679722	0.320278	1
5	'Paenibacillus sp. JDR-2'	'Firmicutes'	0	0	0.999991	8.82047e-06	0
5	'Pasteurella multocida subsp. multocida str. Pm70'	'Gammaproteobacteria'	1	1	0.176529	0.823471	0
5	'Propionibacterium acnes KPA171202'	'Actinobacteria'	1	1	0.110266	0.889734	0
5	'Rhodopseudomonas palustris BisB18'	'Alphaproteobacteria'	0	0	0.999976	2.43381e-05	0
5	'Rhodospirillum rubrum ATCC 11170'	'Alphaproteobacteria'	0	0	0.966121	0.0338795	0
5	'Robiginitalea biformata HTCC2501'	'Bacteroidetes/Chlorobi'	0	0	0.986565	0.0134345	0
5	'Roseobacter denitrificans OCh 114'	'Alphaproteobacteria'	0	0	0.987475	0.0125249	0
5	'Salmonella enterica subsp. arizonae serovar 62:z4z23:-- str. RSK2980'	'Gammaproteobacteria'	1	1	0.00888977	0.99111	0
5	'Shigella boydii Sb227'	'Gammaproteobacteria'	1	1	3.82991e-10	1	0
5	'Spirosoma linguale DSM 74'	'Bacteroidetes/Chlorobi'	0	0	0.999996	3.73014e-06	0
5	'Staphylococcus aureus subsp. aureus MW2'	'Firmicutes'	1	1	1.23418e-11	1	0
5	'Staphylococcus aureus subsp. aureus USA300_TCH1516'	'Firmicutes'	1	1	8.4867e-10	1	0
5	'Streptococcus pneumoniae 70585'	'Firmicutes'	1	1	6.24239e-07	0.999999	0
5	'Streptococcus pneumoniae AP200'	'Firmicutes'	1	1	6.5902e-06	0.999993	0
5	'Streptococcus pyogenes M1 GAS'	'Firmicutes'	1	1	0.0674402	0.93256	0
5	'Streptococcus pyogenes MGAS6180'	'Firmicutes'	1	1	0.0281391	0.971861	0
5	'Streptococcus thermophilus LMD-9'	'Firmicutes'	0	0	0.91847	0.0815296	0
5	'Sulfurimonas denitrificans DSM 1251'	'Epsilonproteobacteria'	0	0	0.87362	0.12638	0
5	'Verminephrobacter eiseniae EF01-2'	'Betaproteobacteria'	0	0	0.999574	0.000426161	0
5	'Wigglesworthia glossinidia endosymbiont of Glossina brevipalpis'	'Gammaproteobacteria'	0	0	0.999262	0.000738031	0
5	'Yersinia pseudotuberculosis PB1/+'	'Gammaproteobacteria'	1	1	0.00312128	0.996879	0
6	'Acidovorax ebreus TPSY'	'Betaproteobacteria'	0	0	1	1e-07	0
6	'Alteromonas macleodii ''Deep ecotype'''	'Gammaproteobacteria'	0	0	0.999985	1.49228e-05	0
6	'Bacillus cereus B4264'	'Firmicutes'	1	1	0.021913	0.978087	0
6	'Bacillus pumilus SAFR-032'	'Firmicutes'	0	0	0.974342	0.0256584	0
6	'Bacteroides fragilis NCTC 9343'	'Bacteroidetes/Chlorobi'	1	1	0.0943021	0.905698	0
6	'Bacteroides fragilis YCH46'	'Bacteroidetes/Chlorobi'	1	1	0.0486928	0.951307	0
6	'Borrelia afzelii PKo'	'Spirochaetes'	1	1	0.0474912	0.952509	0
6	'Burkholderia ambifaria MC40-6'	'Betaproteobacteria'	1	1	0.162781	0.837219	0
6	'Burkholderia multivorans ATCC 17616'	'Betaproteobacteria'	1	1	0.181485	0.818515	0
6	'Burkholderia vietnamiensis G4'	'Betaproteobacteria'	1	1	0.0132112	0.986789	0
6	'Candidatus Ruthia magnifica str. Cm (Calyptogena magnifica)'	'Gammaproteobacteria'	0	0	0.988516	0.0114835	0
6	'Cellvibrio japonicus Ueda107'	'Gammaproteobacteria'	0	0	0.99954	0.000459995	0
6	'Chlorobium chlorochromatii CaD3'	'Bacteroidetes/Chlorobi'	0	0	0.991973	0.00802722	0
6	'Chlorobium luteolum DSM 273'	'Bacteroidetes/Chlorobi'	0	0	0.993941	0.00605879	0
6	'Chlorobium phaeobacteroides BS1'	'Bacteroidetes/Chlorobi'	0	0	0.992846	0.00715408	0
6	'Chloroherpeton thalassium ATCC 35110'	'Bacteroidetes/Chlorobi'	0	0	0.999354	0.000646036	0
6	'Chromohalobacter salexigens DSM 3043'	'Gammaproteobacteria'	0	0	0.999998	1.57075e-06	0
6	'Clostridium botulinum A2 str. Kyoto'	'Firmicutes'	1	1	0.0150972	0.984903	0
6	'Corynebacterium kroppenstedtii DSM 44385'	'Actinobacteria'	0	1	0.147277	0.852723	1
6	'Croceibacter atlanticus HTCC2559'	'Bacteroidetes/Chlorobi'	0	0	0.729355	0.270645	0
6	'Cupriavidus metallidurans CH34'	'Betaproteobacteria'	0	1	0.298281	0.701719	1
6	'Francisella tularensis subsp. holarctica OSU18'	'Gammaproteobacteria'	1	1	0.00737176	0.992628	0
6	'Gardnerella vaginalis 409-05'	'Actinobacteria'	1	1	0.0108013	0.989199	0
6	'Geobacillus sp. Y412MC52'	'Firmicutes'	0	0	1	1e-07	0
6	'Halanaerobium sp. ''sapolanicus'''	'Firmicutes'	0	0	0.999596	0.000403939	0
6	'Helicobacter pylori 26695'	'Epsilonproteobacteria'	1	1	0.0178775	0.982123	0
6	'Helicobacter pylori B8'	'Epsilonproteobacteria'	1	1	0.0217469	0.978253	0
6	'Hyphomicrobium denitrificans ATCC 51888'	'Alphaproteobacteria'	0	0	0.989896	0.0101037	0
6	'Kocuria rhizophila DC2201'	'Actinobacteria'	0	0	0.909895	0.0901053	0
6	'Lactobacillus acidophilus NCFM'	'Firmicutes'	0	0	0.985255	0.0147449	0
6	'Lactobacillus casei ATCC 334'	'Firmicutes'	0	0	0.999975	2.53329e-05	0
6	'Lactobacillus reuteri DSM 20016'	'Firmicutes'	0	0	0.987824	0.0121765	0
6	'Legionella pneumophila str. Corby'	'Gammaproteobacteria'	1	0	0.912201	0.0877991	1
6	'Magnetospirillum magneticum AMB-1'	'Alphaproteobacteria'	0	0	0.99929	0.000709894	0
6	'Mesorhizobium loti MAFF303099'	'Alphaproteobacteria'	0	0	0.999674	0.000325983	0
6	'Methylocella silvestris BL2'	'Alphaproteobacteria'	0	0	0.99163	0.00836971	0
6	'Micromonospora aurantiaca ATCC 27029'	'Actinobacteria'	0	0	0.941133	0.0588669	0
6	'Mycobacterium bovis AF2122/97'	'Actinobacteria'	1	1	0.0731262	0.926874	0
6	'Mycobacterium tuberculosis KZN 1435'	'Actinobacteria'	1	1	0.106754	0.893246	0
6	'Mycobacterium ulcerans Agy99'	'Actinobacteria'	1	1	0.0118408	0.988159	0
6	'Natranaerobius thermophilus JW/NM-WN-LF'	'Firmicutes'	0	0	0.999979	2.11048e-05	0
6	'Rhodobacter sphaeroides ATCC 17025'	'Alphaproteobacteria'	0	0	0.999999	9.67465e-07	0
6	'Rickettsia prowazekii str. Madrid E'	'Alphaproteobacteria'	1	1	0.0970369	0.902963	0
6	'Saccharopolyspora erythraea NRRL 2338'	'Actinobacteria'	0	0	0.938009	0.0619911	0
6	'Salmonella enterica subsp. enterica serovar Heidelberg str. SL476'	'Gammaproteobacteria'	1	1	3.39503e-06	0.999997	0
6	'Salmonella enterica subsp. enterica serovar Paratyphi A str. AKU_12601'	'Gammaproteobacteria'	1	1	6.45108e-08	1	0
6	'Serratia proteamaculans 568'	'Gammaproteobacteria'	1	1	1.77191e-05	0.999982	0
6	'Shewanella putrefaciens CN-32'	'Gammaproteobacteria'	1	1	0.0351318	0.964868	0
6	'Sideroxydans lithotrophicus ES-1'	'Gammaproteobacteria'	0	0	0.994103	0.00589729	0
6	'Sinorhizobium medicae WSM419'	'Alphaproteobacteria'	0	0	0.997519	0.00248085	0
6	'Sodalis glossinidius str. ''morsitans'''	'Gammaproteobacteria'	0	1	0.0165462	0.983454	1
6	'Staphylococcus aureus subsp. aureus JH1'	'Firmicutes'	1	1	1.23418e-11	1	0
6	'Staphylococcus aureus subsp. aureus MRSA252'	'Firmicutes'	1	1	3.42327e-10	1	0
6	'Streptococcus agalactiae 2603V/R'	'Firmicutes'	1	1	0.0428568	0.957143	0
6	'Streptococcus pneumoniae TIGR4'	'Firmicutes'	1	1	6.5902e-06	0.999993	0
6	'Streptococcus pyogenes MGAS2096'	'Firmicutes'	1	1	0.0160295	0.983971	0
6	'Streptococcus pyogenes str. Manfredo'	'Firmicutes'	1	1	0.0332784	0.966722	0
6	'Streptococcus suis 05ZYH33'	'Firmicutes'	1	1	0.0830382	0.916962	0
6	'Streptococcus suis P1/7'	'Firmicutes'	1	1	0.031663	0.968337	0
6	'Sulfurovum sp. NBC37-1'	'Epsilonproteobacteria'	0	0	0.914401	0.085599	0
6	'Thermobispora bispora DSM 43833'	'Actinobacteria'	0	0	0.999259	0.000741393	0
6	'Thiomicrospira crunogena XCL-2'	'Gammaproteobacteria'	0	0	0.994871	0.00512916	0
6	'Variovorax paradoxus S110'	'Betaproteobacteria'	0	0	0.99998	1.99175e-05	0
6	'Vibrio cholerae O395'	'Gammaproteobacteria'	1	1	3.61894e-06	0.999996	0
6	'Vibrio parahaemolyticus RIMD 2210633'	'Gammaproteobacteria'	1	1	0.00304404	0.996956	0
7	'Acinetobacter baumannii AYE'	'Gammaproteobacteria'	1	1	2.45559e-06	0.999998	0
7	'Alkalilimnicola ehrlichii MLHE-1'	'Gammaproteobacteria'	0	0	1	2.11593e-07	0
7	'Anaplasma phagocytophilum HZ'	'Alphaproteobacteria'	1	1	0.106785	0.893215	0
7	'Bacillus amyloliquefaciens DSM 7'	'Firmicutes'	0	0	0.91863	0.0813704	0
7	'Bacillus licheniformis ATCC 14580'	'Firmicutes'	1	1	0.301629	0.698371	0
7	'Baumannia cicadellinicola str. Hc (Homalodisca coagulata)'	'Gammaproteobacteria'	0	0	0.932821	0.0671788	0
7	'Bifidobacterium animalis subsp. lactis DSM 10140'	'Actinobacteria'	0	0	0.859165	0.140835	0
7	'Borrelia hermsii DAH'	'Spirochaetes'	1	1	0.0033813	0.996619	0
7	'Brucella suis 1330'	'Alphaproteobacteria'	1	1	0.0971262	0.902874	0
7	'Burkholderia phymatum STM815'	'Betaproteobacteria'	0	0	0.697625	0.302375	0
7	'Burkholderia xenovorans LB400'	'Betaproteobacteria'	1	1	0.222904	0.777096	0
7	'Campylobacter curvus 525.92'	'Epsilonproteobacteria'	1	1	0.131562	0.868438	0
7	'Campylobacter hominis ATCC BAA-381'	'Epsilonproteobacteria'	0	0	0.969446	0.0305539	0
7	'Candidatus Riesia pediculicola USDA'	'Gammaproteobacteria'	0	0	0.845501	0.154499	0
7	'Candidatus Vesicomyosocius okutanii HA'	'Gammaproteobacteria'	0	0	0.8298	0.1702	0
7	'Cellulophaga algicola DSM 14237'	'Bacteroidetes/Chlorobi'	0	0	0.942086	0.0579144	0
7	'Chromobacterium violaceum ATCC 12472'	'Betaproteobacteria'	1	1	1.01439e-07	1	0
7	'Clostridium botulinum B1 str. Okra'	'Firmicutes'	1	1	0.0657283	0.934272	0
7	'Clostridium cellulovorans 743B'	'Firmicutes'	0	0	0.998097	0.00190288	0
7	'Coxiella burnetii CbuK_Q154'	'Gammaproteobacteria'	1	1	0.0622923	0.937708	0
7	'Escherichia coli ED1a'	'Gammaproteobacteria'	1	1	0.0171657	0.982834	0
7	'Escherichia coli O157:H7 str. EC4115'	'Gammaproteobacteria'	1	1	3.15468e-07	1	0
7	'Escherichia coli S88'	'Gammaproteobacteria'	1	1	0.00667396	0.993326	0
7	'Exiguobacterium sp. AT1b'	'Firmicutes'	0	0	0.999991	9.23731e-06	0
7	'Finegoldia magna ATCC 29328'	'Firmicutes'	1	1	0.456118	0.543882	0
7	'Gordonia bronchialis DSM 43247'	'Actinobacteria'	1	1	0.141701	0.858299	0
7	'Haemophilus somnus 129PT'	'Gammaproteobacteria'	1	1	0.0174131	0.982587	0
7	'Helicobacter pylori HPAG1'	'Epsilonproteobacteria'	1	1	0.0120672	0.987933	0
7	'Herminiimonas arsenicoxydans'	'Betaproteobacteria'	0	0	0.973436	0.0265639	0
7	'Lactococcus lactis subsp. cremoris MG1363'	'Firmicutes'	0	0	0.898899	0.101101	0
7	'Leptospira borgpetersenii serovar Hardjo-bovis JB197'	'Spirochaetes'	1	1	0.0835695	0.91643	0
7	'Leuconostoc mesenteroides subsp. mesenteroides ATCC 8293'	'Firmicutes'	0	0	0.996	0.00400043	0
7	'Mycobacterium sp. MCS'	'Actinobacteria'	0	0	0.909293	0.0907071	0
7	'Neisseria lactamica 020-06'	'Betaproteobacteria'	0	0	0.835644	0.164356	0
7	'Nitrobacter winogradskyi Nb-255'	'Alphaproteobacteria'	0	0	0.999682	0.000318383	0
7	'Oenococcus oeni PSU-1'	'Firmicutes'	0	0	0.822275	0.177725	0
7	'Oligotropha carboxidovorans OM5'	'Alphaproteobacteria'	0	0	0.974633	0.0253672	0
7	'Parvibaculum lavamentivorans DS-1'	'Alphaproteobacteria'	0	0	0.99994	6.00319e-05	0
7	'Pediococcus pentosaceus ATCC 25745'	'Firmicutes'	0	0	0.962013	0.0379871	0
7	'Pseudoalteromonas haloplanktis TAC125'	'Gammaproteobacteria'	0	0	0.99949	0.000509699	0
7	'Pseudomonas mendocina ymp'	'Gammaproteobacteria'	1	0	0.996756	0.00324402	1
7	'Rhodobacter sphaeroides ATCC 17029'	'Alphaproteobacteria'	0	0	1	2.82357e-07	0
7	'Rhodoferax ferrireducens T118'	'Betaproteobacteria'	0	0	0.999998	2.05199e-06	0
7	'Rhodopseudomonas palustris CGA009'	'Alphaproteobacteria'	0	0	0.999991	9.13475e-06	0
7	'Salinispora tropica CNB-440'	'Actinobacteria'	0	0	0.855872	0.144128	0
7	'Shigella flexneri 2a str. 301'	'Gammaproteobacteria'	1	1	1.26042e-05	0.999987	0
7	'Staphylococcus aureus subsp. aureus N315'	'Firmicutes'	1	1	4.59516e-11	1	0
7	'Streptococcus equi subsp. zooepidemicus MGCS10565'	'Firmicutes'	1	1	0.0758928	0.924107	0
7	'Streptococcus mitis B6'	'Firmicutes'	1	1	0.0801137	0.919886	0
7	'Streptococcus pneumoniae CGSP14'	'Firmicutes'	1	1	3.97773e-07	1	0
7	'Streptococcus pyogenes MGAS10750'	'Firmicutes'	1	1	0.0711088	0.928891	0
7	'Streptococcus pyogenes MGAS5005'	'Firmicutes'	1	1	0.0116893	0.988311	0
7	'Streptococcus suis BM407'	'Firmicutes'	1	1	0.0958706	0.904129	0
7	'Streptococcus thermophilus CNRZ1066'	'Firmicutes'	0	0	0.902292	0.0977085	0
7	'Thermoanaerobacter sp. X514'	'Firmicutes'	0	0	0.804449	0.195551	0
7	'Thermomonospora curvata DSM 43183'	'Actinobacteria'	0	0	0.994888	0.00511244	0
7	'Treponema denticola ATCC 35405'	'Spirochaetes'	1	0	0.707461	0.292539	1
7	'Tropheryma whipplei TW08/27'	'Actinobacteria'	1	1	0.0614946	0.938505	0
7	'Tsukamurella paurometabola DSM 20162'	'Actinobacteria'	1	1	0.0220979	0.977902	0
7	'Veillonella parvula DSM 2008'	'Firmicutes'	1	0	0.900773	0.0992271	1
7	'Wolinella succinogenes DSM 1740'	'Epsilonproteobacteria'	0	0	0.669445	0.330555	0
7	'Xanthobacter autotrophicus Py2'	'Alphaproteobacteria'	0	0	0.99386	0.00614032	0
7	'Yersinia pestis Z176003'	'Gammaproteobacteria'	1	1	0.0845695	0.91543	0
8	'Acidothermus cellulolyticus 11B'	'Actinobacteria'	0	0	0.877151	0.122849	0
8	'Agrobacterium radiobacter K84'	'Alphaproteobacteria'	0	0	0.999632	0.000367772	0
8	'Asticcacaulis excentricus CB 48'	'Alphaproteobacteria'	0	0	0.942086	0.0579144	0
8	'Bacillus cereus 03BB102'	'Firmicutes'	1	1	0.00368606	0.996314	0
8	'Bacillus cereus E33L'	'Firmicutes'	1	1	0.0151926	0.984807	0
8	'Bifidobacterium longum subsp. infantis ATCC 15697'	'Actinobacteria'	0	0	0.992824	0.00717622	0
8	'Bordetella pertussis Tohama I'	'Betaproteobacteria'	1	1	0.0800352	0.919965	0
8	'Borrelia burgdorferi B31'	'Spirochaetes'	1	1	0.00371531	0.996285	0
8	'Brevibacillus brevis NBRC 100599'	'Firmicutes'	0	0	0.999986	1.41502e-05	0
8	'Brucella melitensis ATCC 23457'	'Alphaproteobacteria'	1	1	0.0374419	0.962558	0
8	'Brucella melitensis bv. 1 str. 16M'	'Alphaproteobacteria'	1	1	0.111825	0.888175	0
8	'Buchnera aphidicola str. APS (Acyrthosiphon pisum)'	'Gammaproteobacteria'	0	0	0.997444	0.0025562	0
8	'Buchnera aphidicola str. Tuc7 (Acyrthosiphon pisum)'	'Gammaproteobacteria'	0	0	0.982707	0.0172925	0
8	'Burkholderia mallei SAVP1'	'Betaproteobacteria'	1	1	0.0644474	0.935553	0
8	'Caldicellulosiruptor hydrothermalis 108'	'Firmicutes'	0	0	1	3.88112e-07	0
8	'Candidatus Blochmannia pennsylvanicus str. BPEN'	'Gammaproteobacteria'	0	0	0.972317	0.0276833	0
8	'Candidatus Sulcia muelleri CARI'	'Bacteroidetes/Chlorobi'	0	0	0.855681	0.144319	0
8	'Clostridium botulinum A str. ATCC 3502'	'Firmicutes'	1	1	0.0585695	0.941431	0
8	'Comamonas testosteroni CNB-1'	'Betaproteobacteria'	0	0	0.999561	0.000438812	0
8	'Corynebacterium diphtheriae NCTC 13129'	'Actinobacteria'	1	1	2.55049e-08	1	0
8	'Corynebacterium glutamicum ATCC 13032'	'Actinobacteria'	0	0	0.923921	0.076079	0
8	'Dyadobacter fermentans DSM 18053'	'Bacteroidetes/Chlorobi'	0	0	0.999926	7.39361e-05	0
8	'Erythrobacter litoralis HTCC2594'	'Alphaproteobacteria'	0	0	0.999789	0.000211173	0
8	'Escherichia coli 55989'	'Gammaproteobacteria'	1	1	0.0089842	0.991016	0
8	'Escherichia coli str. K-12 substr. DH10B'	'Gammaproteobacteria'	0	1	0.0624933	0.937507	1
8	'Escherichia coli UMN026'	'Gammaproteobacteria'	1	1	5.14648e-07	0.999999	0
8	'Ferrimonas balearica DSM 9799'	'Gammaproteobacteria'	0	0	0.998818	0.00118151	0
8	'Francisella tularensis subsp. mediasiatica FSC147'	'Gammaproteobacteria'	1	1	4.87139e-06	0.999995	0
8	'Gallionella capsiferriformans ES-2'	'Betaproteobacteria'	0	0	0.997954	0.00204598	0
8	'Helicobacter pylori Shi470'	'Epsilonproteobacteria'	1	1	0.0178775	0.982123	0
8	'Legionella longbeachae NSW150'	'Gammaproteobacteria'	1	1	0.0794208	0.920579	0
8	'Leptospira borgpetersenii serovar Hardjo-bovis L550'	'Spirochaetes'	1	1	0.0852672	0.914733	0
8	'Listeria monocytogenes 08-5923'	'Firmicutes'	1	1	0.0623628	0.937637	0
8	'Listeria monocytogenes serotype 4b str. CLIP 80459'	'Firmicutes'	1	1	0.0577653	0.942235	0
8	'Macrococcus caseolyticus JCSC5402'	'Firmicutes'	0	1	0.162918	0.837082	1
8	'Maricaulis maris MCS10'	'Alphaproteobacteria'	0	0	0.998677	0.00132268	0
8	'Mycobacterium tuberculosis CDC1551'	'Actinobacteria'	1	1	0.0232683	0.976732	0
8	'Neisseria meningitidis Z2491'	'Betaproteobacteria'	1	1	0.0357927	0.964207	0
8	'Nocardia farcinica IFM 10152'	'Actinobacteria'	1	1	0.0269455	0.973054	0
8	'Nocardioides sp. JS614'	'Actinobacteria'	0	0	0.603168	0.396832	0
8	'Oceanobacillus iheyensis HTE831'	'Firmicutes'	0	0	0.950229	0.0497715	0
8	'Ochrobactrum anthropi ATCC 49188'	'Alphaproteobacteria'	1	1	0.118075	0.881925	0
8	'Phenylobacterium zucineum HLK1'	'Alphaproteobacteria'	1	1	0.384771	0.615229	0
8	'Photobacterium profundum SS9'	'Gammaproteobacteria'	0	0	0.619492	0.380508	0
8	'Porphyromonas gingivalis W83'	'Bacteroidetes/Chlorobi'	1	1	0.0670948	0.932905	0
8	'Pseudomonas aeruginosa LESB58'	'Gammaproteobacteria'	1	1	1.80641e-07	1	0
8	'Ralstonia pickettii 12D'	'Betaproteobacteria'	0	0	0.999916	8.39171e-05	0
8	'Rhodopseudomonas palustris HaA2'	'Alphaproteobacteria'	0	0	0.988902	0.0110982	0
8	'Rickettsia conorii str. Malish 7'	'Alphaproteobacteria'	1	1	0.0210287	0.978971	0
8	'Rickettsia rickettsii str. ''Sheila Smith'''	'Alphaproteobacteria'	1	1	0.013179	0.986821	0
8	'Salmonella enterica subsp. enterica serovar Paratyphi A str. ATCC 9150'	'Gammaproteobacteria'	1	1	9.6846e-07	0.999999	0
8	'Sinorhizobium fredii NGR234'	'Alphaproteobacteria'	0	0	0.998472	0.00152815	0
8	'Slackia heliotrinireducens DSM 20476'	'Actinobacteria'	0	0	0.779748	0.220252	0
8	'Staphylococcus aureus subsp. aureus COL'	'Firmicutes'	1	1	1.8303e-10	1	0
8	'Staphylococcus haemolyticus JCSC1435'	'Firmicutes'	1	1	0.044173	0.955827	0
8	'Streptococcus pyogenes SSI-1'	'Firmicutes'	1	1	0.0286008	0.971399	0
8	'Streptococcus sanguinis SK36'	'Firmicutes'	1	1	0.305341	0.694659	0
8	'Streptomyces griseus subsp. griseus NBRC 13350'	'Actinobacteria'	0	0	0.947531	0.0524692	0
8	'Symbiobacterium thermophilum IAM 14863'	'Firmicutes'	0	0	0.999909	9.09334e-05	0
8	'Vibrio cholerae O395'	'Gammaproteobacteria'	1	1	1.26974e-06	0.999999	0
8	'Wolbachia endosymbiont of Culex quinquefasciatus Pel'	'Alphaproteobacteria'	0	1	0.35768	0.64232	1
8	'Yersinia pestis CO92'	'Gammaproteobacteria'	1	1	5.46423e-06	0.999995	0
9	'Acinetobacter baumannii ATCC 17978'	'Gammaproteobacteria'	1	1	4.94182e-07	1	0
9	'Arcobacter nitrofigilis DSM 7299'	'Epsilonproteobacteria'	0	0	0.999305	0.000694542	0
9	'Arthrobacter aurescens TC1'	'Actinobacteria'	0	0	0.999665	0.000335148	0
9	'Azospirillum sp. B510'	'Alphaproteobacteria'	0	0	0.999999	5.19648e-07	0
9	'Bacillus cereus AH820'	'Firmicutes'	1	1	0.104154	0.895846	0
9	'Bacillus cereus ATCC 14579'	'Firmicutes'	1	1	0.0107827	0.989217	0
9	'Bacillus cereus G9842'	'Firmicutes'	1	1	0.0510863	0.948914	0
9	'Bacillus clausii KSM-K16'	'Firmicutes'	0	0	0.994801	0.00519941	0
9	'Bacillus halodurans C-125'	'Firmicutes'	0	0	0.999999	8.03744e-07	0
9	'Bacillus selenitireducens MLS10'	'Firmicutes'	0	0	0.999969	3.08713e-05	0
9	'Bartonella henselae str. Houston-1'	'Alphaproteobacteria'	1	1	6.32857e-06	0.999994	0
9	'Brucella melitensis biovar Abortus 2308'	'Alphaproteobacteria'	1	1	6.67522e-08	1	0
9	'Campylobacter jejuni subsp. jejuni 81-176'	'Epsilonproteobacteria'	1	1	1.31123e-07	1	0
9	'Catenulispora acidiphila DSM 44928'	'Actinobacteria'	0	0	0.949155	0.0508449	0
9	'Chitinophaga pinensis DSM 2588'	'Bacteroidetes/Chlorobi'	0	0	0.99729	0.0027101	0
9	'Clostridium botulinum A3 str. Loch Maree'	'Firmicutes'	1	1	0.0317989	0.968201	0
9	'Clostridium botulinum F str. Langeland'	'Firmicutes'	1	1	0.0236244	0.976376	0
9	'Clostridium difficile CD196'	'Firmicutes'	1	1	0.0852648	0.914735	0
9	'Corynebacterium urealyticum DSM 7109'	'Actinobacteria'	1	1	0.0424623	0.957538	0
9	'Coxiella burnetii CbuG_Q212'	'Gammaproteobacteria'	1	1	0.0944328	0.905567	0
9	'Coxiella burnetii RSA 493'	'Gammaproteobacteria'	1	1	0.106667	0.893333	0
9	'Cupriavidus taiwanensis'	'Betaproteobacteria'	0	0	0.99855	0.00145029	0
9	'Enterococcus faecalis V583'	'Firmicutes'	1	1	0.223947	0.776053	0
9	'Escherichia coli O157:H7 str. Sakai'	'Gammaproteobacteria'	1	1	4.60053e-06	0.999995	0
9	'Escherichia coli O55:H7 str. CB9615'	'Gammaproteobacteria'	1	1	3.84938e-08	1	0
9	'Escherichia coli str. K-12 substr. MG1655'	'Gammaproteobacteria'	0	1	0.0818812	0.918119	1
9	'Escherichia coli UTI89'	'Gammaproteobacteria'	1	1	0.0374663	0.962534	0
9	'Escherichia fergusonii ATCC 35469'	'Gammaproteobacteria'	1	0	0.881543	0.118457	1
9	'Francisella tularensis subsp. tularensis FSC198'	'Gammaproteobacteria'	1	1	0.00993491	0.990065	0
9	'Geobacillus sp. Y412MC61'	'Firmicutes'	0	0	1	1e-07	0
9	'Granulibacter bethesdensis CGDNIH1'	'Alphaproteobacteria'	1	0	0.846422	0.153578	1
9	'Hyphomonas neptunium ATCC 15444'	'Alphaproteobacteria'	0	0	0.985242	0.0147578	0
9	'Lactobacillus casei str. Zhang'	'Firmicutes'	0	0	0.999923	7.74455e-05	0
9	'Lactobacillus delbrueckii subsp. bulgaricus ATCC 11842'	'Firmicutes'	0	0	0.996095	0.00390505	0
9	'Methylobacterium extorquens PA1'	'Alphaproteobacteria'	0	0	0.993455	0.0065447	0
9	'Methylobacterium nodulans ORS 2060'	'Alphaproteobacteria'	0	0	0.999978	2.21981e-05	0
9	'Mycobacterium sp. KMS'	'Actinobacteria'	0	0	0.932745	0.0672547	0
9	'Mycoplasma penetrans HF-2'	'Firmicutes'	1	1	0.0943279	0.905672	0
9	'Neisseria meningitidis 053442'	'Betaproteobacteria'	1	1	0.0553187	0.944681	0
9	'Nitrobacter hamburgensis X14'	'Alphaproteobacteria'	0	0	0.999981	1.89654e-05	0
9	'Orientia tsutsugamushi str. Ikeda'	'Alphaproteobacteria'	1	1	0.0405212	0.959479	0
9	'Parvularcula bermudensis HTCC2503'	'Alphaproteobacteria'	0	0	0.853051	0.146949	0
9	'Pseudomonas aeruginosa PA7'	'Gammaproteobacteria'	1	1	0.155549	0.844451	0
9	'Pseudomonas fluorescens Pf0-1'	'Gammaproteobacteria'	0	0	0.999153	0.000847196	0
9	'Rhizobium leguminosarum bv. viciae 3841'	'Alphaproteobacteria'	0	0	0.999989	1.07852e-05	0
9	'Rhodopseudomonas palustris BisA53'	'Alphaproteobacteria'	0	0	1	4.33516e-07	0
9	'Rickettsia canadensis str. McKiel'	'Alphaproteobacteria'	1	1	0.023542	0.976458	0
9	'Rickettsia felis URRWXCal2'	'Alphaproteobacteria'	1	1	0.0155087	0.984491	0
9	'Rickettsia typhi str. Wilmington'	'Alphaproteobacteria'	1	1	0.0731886	0.926811	0
9	'Salmonella enterica subsp. enterica serovar Typhimurium str. LT2'	'Gammaproteobacteria'	1	1	2.31158e-08	1	0
9	'Shewanella baltica OS185'	'Gammaproteobacteria'	0	0	0.97121	0.0287899	0
9	'Shewanella baltica OS223'	'Gammaproteobacteria'	0	0	0.995181	0.00481912	0
9	'Shewanella oneidensis MR-1'	'Gammaproteobacteria'	1	1	0.210061	0.789939	0
9	'Sphingomonas wittichii RW1'	'Alphaproteobacteria'	0	0	0.988009	0.011991	0
9	'Staphylococcus aureus subsp. aureus Mu3'	'Firmicutes'	1	1	4.61125e-11	1	0
9	'Staphylococcus aureus subsp. aureus str. Newman'	'Firmicutes'	1	1	1.25789e-11	1	0
9	'Staphylococcus epidermidis RP62A'	'Firmicutes'	1	1	1.19793e-07	1	0
9	'Streptococcus pneumoniae JJA'	'Firmicutes'	1	1	3.97773e-07	1	0
9	'Streptosporangium roseum DSM 43021'	'Actinobacteria'	0	0	0.998128	0.00187158	0
9	'Thauera sp. MZ1T'	'Betaproteobacteria'	0	0	0.999961	3.90735e-05	0
9	'Thermoanaerobacter mathranii subsp. mathranii str. A3'	'Firmicutes'	0	0	0.999989	1.10365e-05	0
9	'Thermoanaerobacter pseudethanolicus ATCC 33223'	'Firmicutes'	0	0	0.975533	0.0244672	0
9	'Thermoanaerobacter sp. X513'	'Firmicutes'	0	0	0.886455	0.113545	0
9	'Treponema pallidum subsp. pallidum SS14'	'Spirochaetes'	1	1	0.0730357	0.926964	0
9	'Vibrio fischeri MJ11'	'Gammaproteobacteria'	0	0	0.999959	4.11143e-05	0
9	'Yersinia pestis Nepal516'	'Gammaproteobacteria'	1	1	0.00372923	0.996271	0
10	'Acidimicrobium ferrooxidans DSM 10331'	'Actinobacteria'	0	0	0.869001	0.130999	0
10	'Acinetobacter baumannii AB307-0294'	'Gammaproteobacteria'	1	1	5.73033e-06	0.999994	0
10	'Actinobacillus succinogenes 130Z'	'Gammaproteobacteria'	0	1	0.444782	0.555218	1
10	'Alicycliphilus denitrificans BC'	'Betaproteobacteria'	0	0	0.995489	0.00451083	0
10	'Arcanobacterium haemolyticum DSM 20595'	'Actinobacteria'	1	1	0.006903	0.993097	0
10	'Arcobacter butzleri RM4018'	'Epsilonproteobacteria'	1	1	0.281736	0.718264	0
10	'Azoarcus sp. BH72'	'Betaproteobacteria'	0	0	0.999146	0.000854223	0
10	'Azotobacter vinelandii DJ'	'Gammaproteobacteria'	0	0	0.977542	0.0224576	0
10	'Bacillus anthracis str. A0248'	'Firmicutes'	1	1	0.0334153	0.966585	0
10	'Bacillus cereus Q1'	'Firmicutes'	0	1	0.0622713	0.937729	1
10	'Bifidobacterium longum DJO10A'	'Actinobacteria'	0	0	0.922764	0.0772356	0
10	'Bordetella parapertussis 12822'	'Betaproteobacteria'	1	1	0.380841	0.619159	0
10	'Buchnera aphidicola str. Bp (Baizongia pistaciae)'	'Gammaproteobacteria'	0	0	0.893241	0.106759	0
10	'Burkholderia mallei NCTC 10229'	'Betaproteobacteria'	1	1	0.00692026	0.99308	0
10	'Candidatus Azobacteroides pseudotrichonymphae genomovar. CFP2'	'Bacteroidetes/Chlorobi'	0	0	0.981524	0.0184761	0
10	'Chlorobium phaeovibrioides DSM 265'	'Bacteroidetes/Chlorobi'	0	0	0.619041	0.380959	0
10	'Clostridium beijerinckii NCIMB 8052'	'Firmicutes'	0	0	0.903093	0.0969069	0
10	'Clostridium botulinum E3 str. Alaska E43'	'Firmicutes'	1	0	0.969714	0.0302855	1
10	'Clostridium kluyveri NBRC 12016'	'Firmicutes'	0	0	0.91558	0.0844197	0
10	'Conexibacter woesei DSM 14684'	'Actinobacteria'	0	0	0.988533	0.0114673	0
10	'Corynebacterium efficiens YS-314'	'Actinobacteria'	0	0	0.630302	0.369698	0
10	'Corynebacterium glutamicum ATCC 13032'	'Actinobacteria'	0	0	0.826651	0.173349	0
10	'Desulfitobacterium hafniense DCB-2'	'Firmicutes'	0	0	0.999405	0.000594937	0
10	'Escherichia coli E24377A'	'Gammaproteobacteria'	1	1	0.0585565	0.941444	0
10	'Francisella tularensis subsp. holarctica FTNF002-00'	'Gammaproteobacteria'	1	1	1.50994e-05	0.999985	0
10	'Francisella tularensis subsp. tularensis SCHU S4'	'Gammaproteobacteria'	1	1	4.06858e-06	0.999996	0
10	'Frankia alni ACN14a'	'Actinobacteria'	0	0	0.974712	0.0252883	0
10	'Haemophilus influenzae PittGG'	'Gammaproteobacteria'	1	1	2.44088e-07	1	0
10	'Helicobacter pylori B38'	'Epsilonproteobacteria'	1	1	0.0352896	0.96471	0
10	'Helicobacter pylori P12'	'Epsilonproteobacteria'	1	1	0.252335	0.747665	0
10	'Lactobacillus gasseri ATCC 33323'	'Firmicutes'	0	0	0.962852	0.0371476	0
10	'Lactobacillus helveticus DPC 4571'	'Firmicutes'	0	0	0.993682	0.00631843	0
10	'Lactobacillus rhamnosus Lc 705'	'Firmicutes'	0	0	0.999993	6.7302e-06	0
10	'Listeria monocytogenes EGD-e'	'Firmicutes'	1	1	0.0577653	0.942235	0
10	'Listeria monocytogenes HCC23'	'Firmicutes'	1	1	0.124517	0.875483	0
10	'Methylococcus capsulatus str. Bath'	'Gammaproteobacteria'	0	0	0.988277	0.0117232	0
10	'Mycobacterium leprae Br4923'	'Actinobacteria'	1	1	0.0830355	0.916964	0
10	'Mycobacterium tuberculosis H37Ra'	'Actinobacteria'	1	1	0.0851945	0.914805	0
10	'Nakamurella multipartita DSM 44233'	'Actinobacteria'	0	0	0.640236	0.359764	0
10	'Paracoccus denitrificans PD1222'	'Alphaproteobacteria'	0	0	0.948353	0.0516474	0
10	'Prosthecochloris aestuarii DSM 271'	'Bacteroidetes/Chlorobi'	0	0	0.986119	0.0138813	0
10	'Proteus mirabilis HI4320'	'Gammaproteobacteria'	1	1	0.00420158	0.995798	0
10	'Pseudomonas putida W619'	'Gammaproteobacteria'	0	0	0.994017	0.00598269	0
10	'Psychrobacter arcticus 273-4'	'Gammaproteobacteria'	0	1	0.305392	0.694608	1
10	'Rhodothermus marinus DSM 4252'	'Bacteroidetes/Chlorobi'	0	0	0.981483	0.0185173	0
10	'Rickettsia rickettsii str. Iowa'	'Alphaproteobacteria'	1	1	0.0143159	0.985684	0
10	'Ruminococcus albus 7'	'Firmicutes'	0	0	0.950622	0.0493781	0
10	'Saccharophagus degradans 2-40'	'Gammaproteobacteria'	0	0	0.999838	0.000162095	0
10	'Salmonella enterica subsp. enterica serovar Paratyphi B str. SPB7'	'Gammaproteobacteria'	1	1	1.15445e-07	1	0
10	'Salmonella enterica subsp. enterica serovar Schwarzengrund str. CVM19633'	'Gammaproteobacteria'	1	1	1.60674e-07	1	0
10	'Salmonella enterica subsp. enterica serovar Typhi str. Ty2'	'Gammaproteobacteria'	1	1	5.54796e-09	1	0
10	'Shewanella sp. W3-18-1'	'Gammaproteobacteria'	1	0	0.628556	0.371444	1
10	'Spirochaeta smaragdinae DSM 11293'	'Spirochaetes'	0	0	0.737544	0.262456	0
10	'Staphylococcus epidermidis ATCC 12228'	'Firmicutes'	1	1	3.0352e-08	1	0
10	'Stenotrophomonas maltophilia K279a'	'Gammaproteobacteria'	1	1	0.184125	0.815875	0
10	'Streptococcus mutans UA159'	'Firmicutes'	1	1	0.071805	0.928195	0
10	'Streptococcus pyogenes MGAS315'	'Firmicutes'	1	1	0.0332784	0.966722	0
10	'Streptococcus suis SC84'	'Firmicutes'	1	1	0.031663	0.968337	0
10	'Streptomyces coelicolor A3(2)'	'Actinobacteria'	0	0	0.981422	0.018578	0
10	'Thermosediminibacter oceani DSM 16646'	'Firmicutes'	0	0	0.999761	0.000239426	0
10	'Thioalkalivibrio sp. K90mix'	'Gammaproteobacteria'	0	0	0.9984	0.00159951	0
10	'Vibrio vulnificus CMCP6'	'Gammaproteobacteria'	1	1	0.177426	0.822574	0
10	'Yersinia pestis Angola'	'Gammaproteobacteria'	1	1	3.07522e-06	0.999997	0
10	'Yersinia pestis Antiqua'	'Gammaproteobacteria'	1	1	1.41405e-06	0.999999	0
10	'Yersinia pseudotuberculosis IP 31758'	'Gammaproteobacteria'	1	1	3.33982e-07	1	0
10	'Zymomonas mobilis subsp. mobilis ZM4'	'Alphaproteobacteria'	0	0	0.6046	0.3954	0

## Sheet: DV-IDENTITY-0
#VALUE!	FALSE	FALSE	FALSE	FALSE	FALSE	FALSE	FALSE	FALSE	#REF!	FALSE	FALSE	FALSE	FALSE	FALSE	FALSE	FALSE	FALSE	#REF!	FALSE	FALSE	FALSE	FALSE	FALSE	FALSE	FALSE	FALSE	#REF!	FALSE	FALSE	FALSE	FALSE	FALSE	FALSE	FALSE	FALSE	0	FALSE	FALSE	FALSE	FALSE	FALSE	FALSE	FALSE	FALSE	0	FALSE	FALSE	FALSE	FALSE
FALSE	FALSE	FALSE	FALSE	FALSE	0	FALSE	FALSE	FALSE	FALSE	FALSE	FALSE	FALSE	FALSE	0	FALSE	FALSE	FALSE	FALSE	FALSE	FALSE	FALSE	FALSE	0	FALSE	FALSE	FALSE	FALSE	FALSE	FALSE	FALSE	FALSE	0	FALSE	FALSE	FALSE	FALSE	FALSE	FALSE	FALSE	FALSE	0	FALSE	FALSE	FALSE	FALSE	FALSE	FALSE	FALSE	FALSE
FALSE	#VALUE!	FALSE	FALSE	FALSE	FALSE	FALSE	FALSE	FALSE	FALSE	0	FALSE	FALSE	FALSE	FALSE	FALSE	FALSE	FALSE	FALSE	0	FALSE	FALSE	FALSE	FALSE	FALSE	FALSE	FALSE	FALSE	0	FALSE	FALSE	FALSE	FALSE	FALSE	FALSE	FALSE	FALSE	0	FALSE	FALSE	FALSE	FALSE	FALSE	FALSE	FALSE	FALSE	0	FALSE	FALSE	FALSE
FALSE	FALSE	FALSE	FALSE	FALSE	FALSE	0	FALSE	FALSE	FALSE	FALSE	FALSE	FALSE	FALSE	FALSE	0	FALSE	FALSE	FALSE	FALSE	FALSE	FALSE	FALSE	FALSE	0	FALSE	FALSE	FALSE	FALSE	FALSE	FALSE	FALSE	FALSE	0	FALSE	FALSE	FALSE	FALSE	FALSE	FALSE	FALSE	FALSE	0	FALSE	FALSE	FALSE	FALSE	FALSE	FALSE	FALSE
FALSE	FALSE	#VALUE!	FALSE	FALSE	FALSE	FALSE	FALSE	FALSE	FALSE	FALSE	0	FALSE	FALSE	FALSE	FALSE	FALSE	FALSE	FALSE	FALSE	0	FALSE	FALSE	FALSE	FALSE	FALSE	FALSE	FALSE	FALSE	0	FALSE	FALSE	FALSE	FALSE	FALSE	FALSE	FALSE	FALSE	0	FALSE	FALSE	FALSE	FALSE	FALSE	FALSE	FALSE	FALSE	0	FALSE	FALSE
FALSE	FALSE	FALSE	FALSE	FALSE	FALSE	FALSE	0	FALSE	FALSE	FALSE	FALSE	FALSE	FALSE	FALSE	FALSE	0	FALSE	FALSE	FALSE	FALSE	FALSE	FALSE	FALSE	FALSE	0	FALSE	FALSE	FALSE	FALSE	FALSE	FALSE	FALSE	FALSE	0	FALSE	FALSE	FALSE	FALSE	FALSE	FALSE	FALSE	FALSE	0	FALSE	FALSE	FALSE	FALSE	FALSE	FALSE
FALSE	FALSE	FALSE	0	FALSE	FALSE	FALSE	FALSE	FALSE	FALSE	FALSE	FALSE	0	FALSE	FALSE	FALSE	FALSE	FALSE	FALSE	FALSE	FALSE	0	FALSE	FALSE	FALSE	FALSE	FALSE	FALSE	FALSE	FALSE	0	FALSE	FALSE	FALSE	FALSE	FALSE	FALSE	FALSE	FALSE	0	FALSE	FALSE	FALSE	FALSE	FALSE	FALSE	FALSE	FALSE	0	FALSE
FALSE	FALSE	FALSE	FALSE	FALSE	FALSE	FALSE	FALSE	0	FALSE	FALSE	FALSE	FALSE	FALSE	FALSE	FALSE	FALSE	0	FALSE	FALSE	FALSE	FALSE	FALSE	FALSE	FALSE	FALSE	0	FALSE	FALSE	FALSE	FALSE	FALSE	FALSE	FALSE	FALSE	0	FALSE	FALSE	FALSE	FALSE	FALSE	FALSE	FALSE	FALSE	0	FALSE	FALSE	FALSE	FALSE	FALSE
FALSE	FALSE	FALSE	FALSE	0	FALSE	FALSE	FALSE	FALSE	FALSE	FALSE	FALSE	FALSE	0	FALSE	FALSE	FALSE	FALSE	FALSE	FALSE	FALSE	FALSE	0	FALSE	FALSE	FALSE	FALSE	FALSE	FALSE	FALSE	FALSE	0	FALSE	FALSE	FALSE	FALSE	FALSE	FALSE	FALSE	FALSE	0	FALSE	FALSE	FALSE	FALSE	FALSE	FALSE	FALSE	FALSE	0
#REF!	FALSE	FALSE	FALSE	FALSE	FALSE	FALSE	FALSE	FALSE	#REF!	FALSE	FALSE	FALSE	FALSE	FALSE	FALSE	FALSE	FALSE	#REF!	FALSE	FALSE	FALSE	FALSE	FALSE	FALSE	FALSE	FALSE	#REF!	FALSE	FALSE	FALSE	FALSE	FALSE	FALSE	FALSE	FALSE	#REF!	FALSE	FALSE	FALSE	FALSE	FALSE	FALSE	FALSE	FALSE	#REF!	FALSE	FALSE	FALSE	FALSE
FALSE	FALSE	FALSE	FALSE	FALSE	0	FALSE	FALSE	FALSE	FALSE	FALSE	FALSE	FALSE	FALSE	0	FALSE	FALSE	FALSE	FALSE	FALSE	FALSE	FALSE	FALSE	0	FALSE	FALSE	FALSE	FALSE	FALSE	FALSE	FALSE	FALSE	0	FALSE	FALSE	FALSE	FALSE	FALSE	FALSE	FALSE	FALSE	0	FALSE	FALSE	FALSE	FALSE	FALSE	FALSE	FALSE	FALSE
FALSE	#VALUE!	FALSE	FALSE	FALSE	FALSE	FALSE	FALSE	FALSE	FALSE	0	FALSE	FALSE	FALSE	FALSE	FALSE	FALSE	FALSE	FALSE	0	FALSE	FALSE	FALSE	FALSE	FALSE	FALSE	FALSE	FALSE	0	FALSE	FALSE	FALSE	FALSE	FALSE	FALSE	FALSE	FALSE	0	FALSE	FALSE	FALSE	FALSE	FALSE	FALSE	FALSE	FALSE	0	FALSE	FALSE	FALSE
FALSE	FALSE	FALSE	FALSE	FALSE	FALSE	0	FALSE	FALSE	FALSE	FALSE	FALSE	FALSE	FALSE	FALSE	0	FALSE	FALSE	FALSE	FALSE	FALSE	FALSE	FALSE	FALSE	0	FALSE	FALSE	FALSE	FALSE	FALSE	FALSE	FALSE	FALSE	0	FALSE	FALSE	FALSE	FALSE	FALSE	FALSE	FALSE	FALSE	0	FALSE	FALSE	FALSE	FALSE	FALSE	FALSE	FALSE
FALSE	FALSE	#VALUE!	FALSE	FALSE	FALSE	FALSE	FALSE	FALSE	FALSE	FALSE	0	FALSE	FALSE	FALSE	FALSE	FALSE	FALSE	FALSE	FALSE	0	FALSE	FALSE	FALSE	FALSE	FALSE	FALSE	FALSE	FALSE	0	FALSE	FALSE	FALSE	FALSE	FALSE	FALSE	FALSE	FALSE	0	FALSE	FALSE	FALSE	FALSE	FALSE	FALSE	FALSE	FALSE	0	FALSE	FALSE
FALSE	FALSE	FALSE	FALSE	FALSE	FALSE	FALSE	0	FALSE	FALSE	FALSE	FALSE	FALSE	FALSE	FALSE	FALSE	0	FALSE	FALSE	FALSE	FALSE	FALSE	FALSE	FALSE	FALSE	0	FALSE	FALSE	FALSE	FALSE	FALSE	FALSE	FALSE	FALSE	0	FALSE	FALSE	FALSE	FALSE	FALSE	FALSE	FALSE	FALSE	0	FALSE	FALSE	FALSE	FALSE	FALSE	FALSE
FALSE	FALSE	FALSE	0	FALSE	FALSE	FALSE	FALSE	FALSE	FALSE	FALSE	FALSE	0	FALSE	FALSE	FALSE	FALSE	FALSE	FALSE	FALSE	FALSE	0	FALSE	FALSE	FALSE	FALSE	FALSE	FALSE	FALSE	FALSE	0	FALSE	FALSE	FALSE	FALSE	FALSE	FALSE	FALSE	FALSE	0	FALSE	FALSE	FALSE	FALSE	FALSE	FALSE	FALSE	FALSE	0	FALSE
FALSE	FALSE	FALSE	FALSE	FALSE	FALSE	FALSE	FALSE	0	FALSE	FALSE	FALSE	FALSE	FALSE	FALSE	FALSE	FALSE	0	FALSE	FALSE	FALSE	FALSE	FALSE	FALSE	FALSE	FALSE	0	FALSE	FALSE	FALSE	FALSE	FALSE	FALSE	FALSE	FALSE	0	FALSE	FALSE	FALSE	FALSE	FALSE	FALSE	FALSE	FALSE	0	FALSE	FALSE	FALSE	FALSE	FALSE
FALSE	FALSE	FALSE	FALSE	0	FALSE	FALSE	FALSE	FALSE	FALSE	FALSE	FALSE	FALSE	0	FALSE	FALSE	FALSE	FALSE	FALSE	FALSE	FALSE	FALSE	0	FALSE	FALSE	FALSE	FALSE	FALSE	FALSE	FALSE	FALSE	0	FALSE	FALSE	FALSE	FALSE	FALSE	FALSE	FALSE	FALSE	0	FALSE	FALSE	FALSE	FALSE	FALSE	FALSE	FALSE	FALSE	0
0	FALSE	FALSE	FALSE	FALSE	FALSE	FALSE	FALSE	FALSE	0	FALSE	FALSE	FALSE	FALSE	FALSE	FALSE	FALSE	FALSE	0	FALSE	FALSE	FALSE	FALSE	FALSE	FALSE	FALSE	FALSE	0	FALSE	FALSE	FALSE	FALSE	FALSE	FALSE	FALSE	FALSE	0	FALSE	FALSE	FALSE	FALSE	FALSE	FALSE	FALSE	FALSE	0	FALSE	FALSE	FALSE	FALSE
FALSE	FALSE	FALSE	FALSE	FALSE	0	FALSE	FALSE	FALSE	FALSE	FALSE	FALSE	FALSE	FALSE	0	FALSE	FALSE	FALSE	FALSE	FALSE	FALSE	FALSE	FALSE	0	FALSE	FALSE	FALSE	FALSE	FALSE	FALSE	FALSE	FALSE	0	FALSE	FALSE	FALSE	FALSE	FALSE	FALSE	FALSE	FALSE	0	FALSE	FALSE	FALSE	FALSE	FALSE	FALSE	FALSE	FALSE
FALSE	#VALUE!	FALSE	FALSE	FALSE	FALSE	FALSE	FALSE	FALSE	FALSE	0	FALSE	FALSE	FALSE	FALSE	FALSE	FALSE	FALSE	FALSE	0	FALSE	FALSE	FALSE	FALSE	FALSE	FALSE	FALSE	FALSE	0	FALSE	FALSE	FALSE	FALSE	FALSE	FALSE	FALSE	FALSE	0	FALSE	FALSE	FALSE	FALSE	FALSE	FALSE	FALSE	FALSE	0	FALSE	FALSE	FALSE
FALSE	FALSE	FALSE	FALSE	FALSE	FALSE	0	FALSE	FALSE	FALSE	FALSE	FALSE	FALSE	FALSE	FALSE	0	FALSE	FALSE	FALSE	FALSE	FALSE	FALSE	FALSE	FALSE	0	FALSE	FALSE	FALSE	FALSE	FALSE	FALSE	FALSE	FALSE	0	FALSE	FALSE	FALSE	FALSE	FALSE	FALSE	FALSE	FALSE	0	FALSE	FALSE	FALSE	FALSE	FALSE	FALSE	FALSE
FALSE	FALSE	#VALUE!	FALSE	FALSE	FALSE	FALSE	FALSE	FALSE	FALSE	FALSE	0	FALSE	FALSE	FALSE	FALSE	FALSE	FALSE	FALSE	FALSE	0	FALSE	FALSE	FALSE	FALSE	FALSE	FALSE	FALSE	FALSE	0	FALSE	FALSE	FALSE	FALSE	FALSE	FALSE	FALSE	FALSE	0	FALSE	FALSE	FALSE	FALSE	FALSE	FALSE	FALSE	FALSE	0	FALSE	FALSE
FALSE	FALSE	FALSE	FALSE	FALSE	FALSE	FALSE	0	FALSE	FALSE	FALSE	FALSE	FALSE	FALSE	FALSE	FALSE	0	FALSE	FALSE	FALSE	FALSE	FALSE	FALSE	FALSE	FALSE	0	FALSE	FALSE	FALSE	FALSE	FALSE	FALSE	FALSE	FALSE	0	FALSE	FALSE	FALSE	FALSE	FALSE	FALSE	FALSE	FALSE	0	FALSE	FALSE	FALSE	FALSE	FALSE	FALSE
FALSE	FALSE	FALSE	FALSE	FALSE	FALSE	FALSE	FALSE	FALSE	FALSE	FALSE	FALSE	FALSE	FALSE	FALSE	FALSE	FALSE	FALSE	FALSE	FALSE	FALSE	FALSE	FALSE	FALSE	FALSE	FALSE	FALSE	FALSE	FALSE	FALSE	FALSE	FALSE	FALSE	FALSE	FALSE	FALSE	FALSE	FALSE	FALSE	FALSE	FALSE	FALSE	FALSE	FALSE	FALSE	FALSE	FALSE	FALSE	FALSE	FALSE
FALSE	FALSE	FALSE	FALSE	FALSE	FALSE	FALSE	FALSE	FALSE	FALSE	FALSE	FALSE	FALSE	FALSE	FALSE	FALSE	FALSE	FALSE	FALSE	FALSE	FALSE	FALSE	FALSE	FALSE	FALSE	FALSE	FALSE	FALSE	FALSE	FALSE	FALSE	FALSE	FALSE	FALSE	FALSE	FALSE	FALSE	FALSE	FALSE	FALSE	FALSE	FALSE	FALSE	FALSE	FALSE	FALSE	FALSE	FALSE	FALSE	FALSE
FALSE	FALSE	FALSE	FALSE	FALSE	FALSE	FALSE	FALSE	FALSE	FALSE	FALSE	FALSE	FALSE	FALSE	FALSE	FALSE	FALSE	FALSE	FALSE	FALSE	FALSE	FALSE	FALSE	FALSE	FALSE	FALSE	FALSE	FALSE	FALSE	FALSE	FALSE	FALSE	FALSE	FALSE	FALSE	FALSE	FALSE	FALSE	FALSE	FALSE	FALSE	FALSE	FALSE	FALSE	FALSE	FALSE	FALSE	FALSE	FALSE	FALSE
[truncated: 206 more columns]
